# Supplementary material for: Wave–Current Interactions in a Wind-jet Region
Source: Copernicus journal article supplement (doi:10.5194/os-2018-103), 2018-10-04
Supplement: Supplementary file [file os-2018-103-AC2-supplement.pdf]

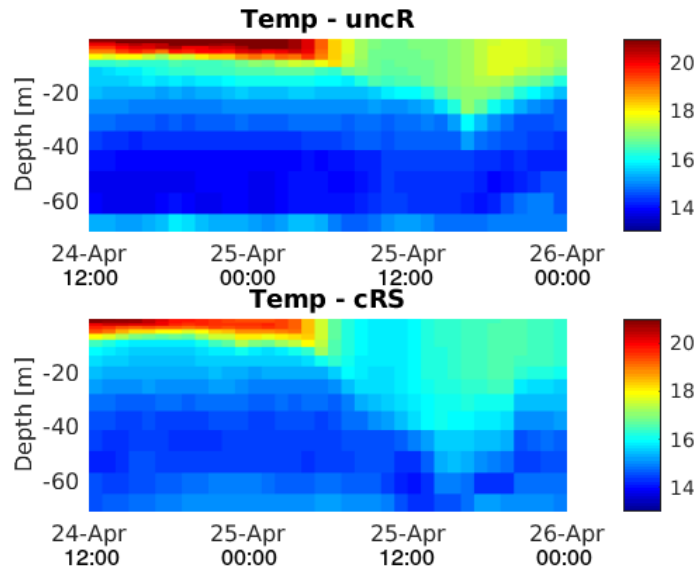

Figure 1. Temperature evolution throughout the wind-jet event E3 at point P1.

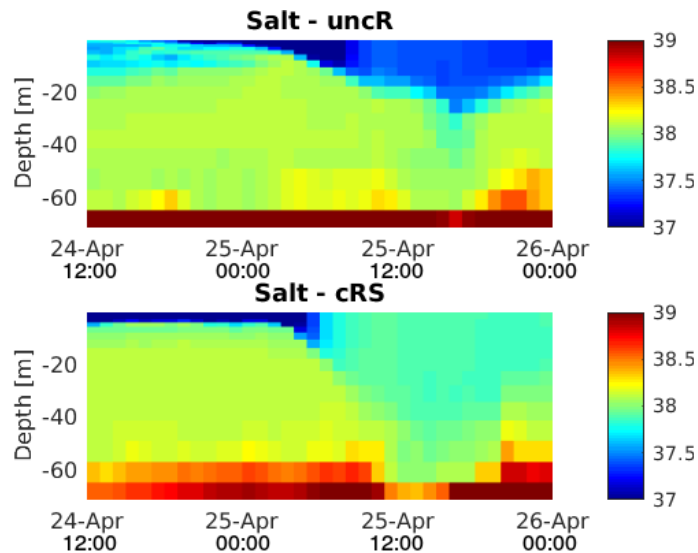

Figure 2. Salinity evolution throughout the wind-jet event E3 at point P1.

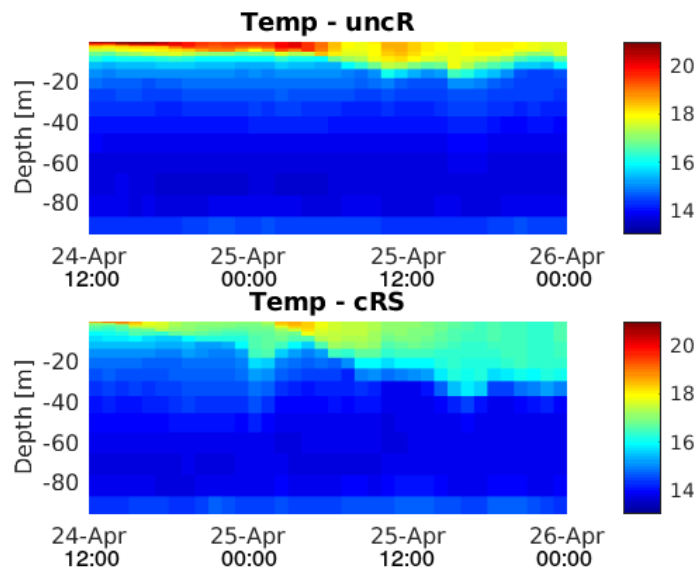

Figure 3. Temperature evolution throughout the wind-jet event E3 at point P3.

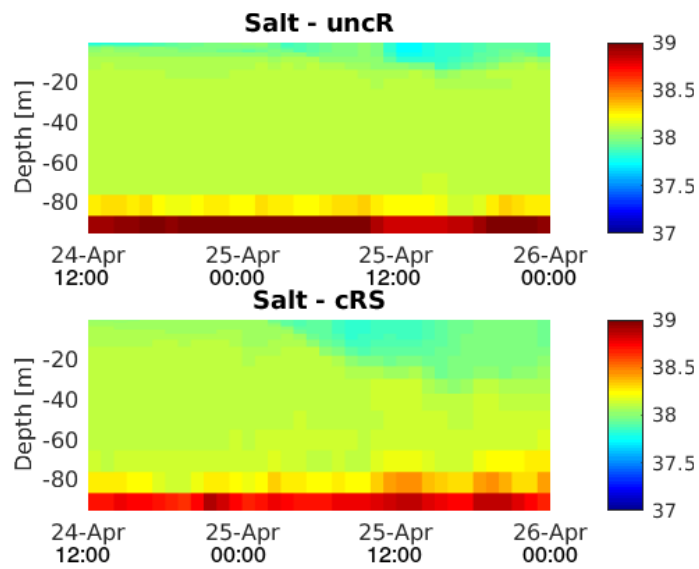

Figure 4. Salinity evolution throughout the wind-jet event E3 at point P3.
